# 1 Tracing contacts to evaluate the transmission of COVID-19 from 2 highly exposed individuals in public transportation

3 Caio Ponte<sup>1</sup>, Humberto A. Carmona<sup>2</sup>, Erneson A. Oliveira<sup>1,3,4\*</sup>, Carlos  
4 Caminha<sup>1</sup>, Antonio S. Lima Neto<sup>5,6</sup>, José S. Andrade Jr.<sup>2</sup>, Vasco Furtado<sup>1,7</sup>

5 <sup>1</sup> *Programa de Pós Graduação em Informática Aplicada,*  
6 *Universidade de Fortaleza, 60811-905 Fortaleza, Ceará, Brasil.*

7 <sup>2</sup> *Departamento de Física, Universidade Federal do Ceará,*  
8 *60455-760 Fortaleza, Ceará, Brasil.*

9 <sup>3</sup> *Laboratório de Ciência de Dados e Inteligência Artificial,*  
10 *Universidade de Fortaleza, 60811-905 Fortaleza, Ceará, Brasil.*

11 <sup>4</sup> *Mestrado Profissional em Ciências da Cidade,*  
12 *Universidade de Fortaleza, 60811-905, Fortaleza, Ceará, Brazil.*

13 <sup>5</sup> *Célula de Vigilância Epidemiológica,*  
14 *Secretaria Municipal da Saúde, 60810-670 Fortaleza, Ceará, Brasil.*

15 <sup>6</sup> *Departamento de Saúde Pública, Universidade de Fortaleza,*  
16 *60451-970 Fortaleza, Ceará, Brasil.*

17 <sup>7</sup> *Empresa de Tecnologia da Informação do Ceará,*  
18 *Governo do Estado do Ceará, 60130-240 Fortaleza, Ceará, Brasil.*

19 (Dated: May 31, 2021)

---

\*Correspondence to: [erneson@unifor.br](mailto:erneson@unifor.br)

## Abstract

20

21 We investigate, through a data-driven contact tracing model, the transmission of  
22 COVID-19 inside buses during distinct phases of the pandemic in a large Brazilian  
23 city. From this microscopic approach, we recover the networks of close contacts within  
24 consecutive time windows. A longitudinal comparison is then performed by upscaling  
25 the traced contacts with the transmission computed from a mean-field compartmental  
26 model for the entire city. Our results show that the effective reproduction numbers  
27 inside the buses,  $Re^{bus}$ , and in the city,  $Re^{city}$ , followed a compatible behavior during  
28 the first wave of the local outbreak. Moreover, by distinguishing the close contacts of  
29 healthcare workers in the buses, we discovered that their transmission,  $Re^{health}$ , during  
30 the same period, was systematically higher than  $Re^{bus}$ . This result reinforces the need  
31 for special public transportation policies for highly exposed groups of people.

32 Keywords: COVID-19. Public Transportation. Contact Tracing. Complex Networks. Compartmental  
33 Models

## 34 I. INTRODUCTION

35 Human mobility is crucial to understanding the COVID-19 pandemic since the Severe  
36 Acute Respiratory Syndrome Coronavirus 2 (SARS-CoV-2) is disseminated individual to  
37 individual via droplet and airborne transmissions [1]. Considering that non-pharmacological  
38 interventions, such as social distancing and isolation, still represent fundamental measures to  
39 control the COVID-19 outbreak, the nature of SARS-CoV-2 dissemination also unveils the  
40 need to understand the role of the space where interaction between people occurs. There  
41 is consensus that superspreading events, which are usually investigated through contact  
42 tracing models [2–7], are more likely to happen in indoor environment, as substantiated by  
43 previous studies of indoor contagion in hospitals [8, 9], restaurants [10], offices [11], and even  
44 on cruise ships [12, 13]. However, the relation between the microscopic level of contagion  
45 in indoor environments and the macroscopic observables, such as the numbers of cases and  
46 deaths at the city scale remains unclear.

47 Public transportation is one of the main forms of commuting, playing an important role in  
48 the pace of life in cities [14], specially in epidemics [15–20]. In spite of the fact that some cities  
49 have adopted social distancing and sanitary protocols on public transportation to control the  
50 COVID-19 outbreak, it is common that buses or subways get crowded at rush hour, mainly  
51 in the developing countries. In recent months, some studies have been proposed to establish  
52 the safety of public transportation regarding the indoor COVID-19 contagion [21–27]. To  
53 the best of our knowledge, however, none of these studies have considered the possibility  
54 of a comparative analysis based on a two-fold perspective, namely, the dynamic of people’s  
55 movement in a city and the dynamic of the virus dissemination within vehicles of public  
56 transport.

57 Here, using data about people’s movement on buses and COVID-19 infection in a large  
58 metropolis, we define two data-driven mathematical models based on concepts of complex  
59 networks and non-linear dynamics in order to foster the understanding of the role public  
60 transportation plays in the COVID-19 pandemic. At the microscopic scale, we define a  
61 contact tracing model to estimate the transmission within city buses and, at the macroscopic  
62 scale, a compartmental model is employed to estimate the transmission in the entire city.  
63 The main contribution of our study is a comparative analysis between these two distinct  
64 modeling approaches through the combination of daily epidemiological and mobility data

65 during the first 9 months of the local COVID-19 outbreak, and through different social  
66 distancing restriction regimes. One specially relevant aspect of this work is the fact that  
67 we are able to trace within the public transportation vehicles (*i.e.*, indoor environments)  
68 two groups of people, one of them with a higher exposure to the virus in comparison to the  
69 other. This allows us to shed light on potentially dangerous superspreading events in public  
70 transportation.

## 71 II. MODELING APPROACH

### 72 A. Contact tracing model

73 We propose a contact tracing model using two datasets that relate bus validations to  
74 COVID-19 confirmed cases during the periods of social isolation, lockdown, and economic  
75 reopening in the city of Fortaleza, Ceará, Brazil (see Methods). Our model is a network based  
76 on Potentially Infectious Contacts (PICs), in which bus passengers during their infectious  
77 period - according to subsequent diagnosis of COVID-19 - have shared the transport for  
78 a certain amount of time with other passengers, the latter in their exposed period - also  
79 according to subsequent COVID-19 diagnosis. Precisely, the proposed network is composed  
80 of vertices  $p_i$  that represent the passengers diagnosed with COVID-19, and weighted directed  
81 edges  $c_k = (p_i, p_j, \tau_{ij})$  that represent PICs. For each edge, the direction is assigned from  
82 an infectious passenger  $p_i$  to an exposed passenger  $p_j$ , and the weight  $\tau_{ij}$  is defined as the  
83 estimated value of the ride time shared by  $p_i$  and  $p_j$  on the same bus, as shown in Fig. 1a.  
84 We calculate  $\tau_{ij}$  by superimposing the estimated ride times from  $p_i$  and  $p_j$ , considering  
85 the different moments of their boarding. Here, the epidemiological profile for COVID-19  
86 transmission is characterized by the dates of the passengers' Onset of Symptoms (OS). The  
87 infectious period corresponds to the days in which a passenger diagnosed with COVID-19  
88 can transmit the virus, initiating 2 days before OS and ending 12 days after OS. The exposed  
89 period refers to the time window during which the passenger can get the virus and maintain  
90 it latent until the infectious period. In this context, the exposed period begins 14 days  
91 before OS and ends 2 days before OS, *i.e.*, the infectious and the exposed periods have a  
92 width of 14 and 12 days, respectively, and they do not overlap [28–30]. Furthermore, if  
93 there is more than one PIC related to an exposed passenger  $p_j$ , we consider solely the edge

94 with the largest value of  $\tau_{ij}$ . It is important to notice that, by crossing the datasets of bus  
95 validations and confirmed cases of COVID-19 in Fortaleza during the period from March to  
96 December 2020, we are able to identify 5,159 pairs of infectious and exposed passengers that  
97 rode the same bus on the same day. However, their associated values of  $\tau_{ij}$  could only be  
98 computed for 3,023 (58.6%), due to missing information in the dataset of bus validations.  
99 From these pairs, we obtain that the network of PICs corresponds to a forest composed of  
100 213 trees with a total of 530 vertices (infectious passengers) and 317 edges (PICs). From  
101 all vertices found, 97 were identified as healthcare workers (see Methods). The Centers for  
102 Disease Control and Prevention (CDC) recommends that any contact tracing strategy for  
103 COVID-19 should consider the concept of Close Contacts (CCs) [31], *i.e.*, anybody who  
104 has been for at least 15 minutes within 6 feet ( $\approx 2$  meters) of an infectious person. Since  
105 buses are small, enclosed, and they have a great tendency to get crowded at rush hours, we  
106 define the CCs in the network of PICs only considering the time condition  $\tau_{ij} > \tau_c$ , where  
107 the threshold  $\tau_c = 15$  minutes. Applying this criterion to the network of PICs, we find  
108 that the network of CCs is composed of 154 trees with a total of 360 vertices (infectious  
109 passengers) and 206 edges (CCs). In this case, 75 vertices were identified as healthcare  
110 workers. In order to understand the COVID-19 spreading in public transportation, we  
111 define the effective reproduction number for the contact tracing model,  $Re^{bus}$ , as the expected  
112 number of secondary cases produced by a single (typical) infection. Precisely, it accounts for  
113 two contributions in relation to who is spreading the disease: one due to reported infectious  
114 individuals,  $Re_r^{bus}$ , and another due to unreported infectious individuals  $Re_u^{bus}$ . Here, we  
115 assume that the fraction of newly reported to newly unreported cases generated by a typical  
116 reported infectious individual remains invariant during time. This is equivalent to consider  
117 the value of  $Re_r^{bus}$  proportional to the average number of outdegrees from the vertices in the  
118 network of CCs during a given time window,  $\langle d_{out}^{CCs} \rangle$ ,

$$Re_r^{bus} = \chi \langle d_{out}^{CCs} \rangle. \quad (1)$$

119 The constant of proportionality  $\chi$  involved in this relation will be explicitly computed  
120 through the calibration between the contact tracing and the compartmental models. Each  
121 consecutive time window has a width of 22 days and a step size of 5 days. We emphasize that  
122 our model has an intrinsic time delay regarding the consolidation of  $Re_r^{bus}$  that can reach  
123  $\approx 53$  days. This value is associated to the time delay in the consolidation of COVID-19

124 dataset ( $\approx 15$  days) and to the superposition of the maxima of two infectious periods and  
125 one exposed period.

## 126 B. Compartmental Model

127 We also adopt a compartmental model to describe the transmission of COVID-19 in order  
128 to estimate the levels of infection of the pathogen in Fortaleza. Here, we propose a SEIIR  
129 model that distinguishes the populations of Susceptible, Exposed, Infectious (reported or  
130 unreported), and Removed (recovered or deceased) individuals, as shown in Fig. 1b. Our  
131 model is inspired by the SEIIR model proposed by Li *et al.* [32]. The reported infectious  
132 population  $I_r$  corresponds to the number of individuals that had the SARS-CoV-2 infection  
133 confirmed by the health system. The unreported infectious population  $I_u$  comprises the com-  
134 plement of  $I_r$ , *i.e.*, individuals that were infected with COVID-19 but remained unknown to  
135 health authorities. We assume that the large majority of the reported infectious individuals  
136 are symptomatic cases, in contrast to the population of unreported infectious individuals -  
137 of which the large majority is assumed to be of asymptomatic cases. Given this fundamental  
138 assumption and considering the recent finding that asymptomatic people are 42% less likely  
139 to transmit the SARS-CoV-2 than symptomatic ones [33], we define that the transmission  
140 rate for the unreported infectious population  $I_u$  is reduced by a factor of  $\mu$  in relation to the  
141 parameter  $\beta$  that represents the transmission rate for the reported infectious population  $I_r$ .  
142 In this context, the time-dependent rate at which the susceptible population  $S$  becomes the  
143 exposed population  $E$  is given by

$$\lambda(t) = \beta \frac{(I_r + \mu I_u)}{N}, \quad (2)$$

144 where  $N$  is the total population of Fortaleza, taken as constant, being approximately equal to  
145 2.67 million people. A fraction  $\alpha$  of the exposed individuals is presumed to become reported  
146 infectious at a rate  $\sigma$ , and the complementary fraction  $(1 - \alpha)$  to evolve to unreported  
147 infected at the same rate. Also, both reported and unreported infectious population are  
148 assumed to become part of the removed population at the same rate  $\gamma$ . We also keep track  
149 of the fraction  $\phi$  of the removed reported infectious population evolving to death, so that  
150 the reported deceased population  $D_r$  increases at a rate of  $\phi\gamma I_r$ . The following system of  
151 coupled differential equations rules our model:

$$\frac{dS}{dt} = -\lambda S, \quad (3)$$

$$\frac{dE}{dt} = \lambda S - \sigma E, \quad (4)$$

$$\frac{dI_r}{dt} = \alpha \sigma E - \gamma I_r, \quad (5)$$

$$\frac{dI_u}{dt} = (1 - \alpha) \sigma E - \gamma I_u, \quad (6)$$

$$\frac{dR}{dt} = (1 - \phi) \gamma I_r + \gamma I_u, \quad (7)$$

$$\frac{dD_r}{dt} = \phi \gamma I_r. \quad (8)$$

152 The total population  $N = S + E + I_r + I_u + R + D_r$  is conserved. Furthermore, it can be  
 153 readily shown [32] that the effective reproduction number  $Re^{city}$  is given by

$$Re^{city} = \left[ \alpha \frac{\beta}{\gamma} + (1 - \alpha) \mu \frac{\beta}{\gamma} \right] \frac{S}{N}. \quad (9)$$

154 From Eq. (9), we can identify  $Re_r^{city} = (\beta/\gamma)(S/N)$  as the average number of secondary in-  
 155 fections due to contagion with reported infectious individuals, while  $Re_u^{city} = \mu(\beta/\gamma)(S/N)$   
 156 is the effective reproduction number due to contagion with unreported infectious individu-  
 157 als. Finally, the SEIIR model is used here as a core model within the Iterative Ensemble  
 158 Kalman Filter (IEnKF) framework (see Methods). This approach allows us to investigate  
 159 the time evolution of the effective reproduction number  $Re^{city}$  by inferring the SEIIR model  
 160 parameters and their populations (see Figs. S1 and S2 of the Supplementary Information).  
 161 The IEnKF framework is systematically applied to running windows of 22 days, with step  
 162 size of 5 days, starting from March 24 to November 9, 2020. We use as observable the  
 163 cumulative number of deaths by SARS-CoV-2 reported daily by the health authorities. For  
 164 the first and subsequent windows, the guesses for the initial populations of exposed,  $E^0$ , and  
 165 deceased individuals,  $D^0$ , are obtained from the daily number of COVID-19 confirmed cases  
 166 and the daily cumulative number of COVID-19 confirmed deaths. As the cumulative num-  
 167 ber of deaths by SARS-CoV-2, both quantities are calculated from the dataset of COVID-19  
 168 confirmed cases and deaths (see Methods). In the particular case of the initial guess for the  
 169 exposed population,  $E^0 = C_i/(\alpha\sigma)$ , where  $C_i$  is the reported number of daily cases. This  
 170 corresponds, for example, to 4,982 individuals in the first window. After using IEnKF to  
 171 estimate the values of all model parameters for the first window, the factor  $Re^{city}$  is calcu-  
 172 lated at its center. These parameters and all populations obtained by numerical integration  
 173 of Eqs. (3)-(8), except for  $E^0$  and  $D^0$ , as previously explained, are used as initial guesses

174 for the second window. The same procedure is then repeated for the third and subsequent  
175 windows.

### 176 III. RESULTS AND DISCUSSION

177 Figure 2a shows the normalized moving averages of bus validations of individuals that  
178 got COVID-19, including healthcare workers. We note that healthcare workers that came  
179 into contact with SARS-CoV-2 during the studied period did not reduce their bus rides as  
180 much as other passengers. In addition, their normalized moving averages of bus validations  
181 are getting closer to each other again as the economic reopening progresses. The inset of  
182 Fig. 2a shows the daily bus validations, which gradually started to increase in the economic  
183 reopening. Figures 2b and 2c show the daily numbers of cases and deaths, respectively,  
184 following the same previous normalization and stratification.

185 The representativeness of the dataset of COVID-19 confirmed cases on buses is assessed  
186 comparing the daily numbers of infectious individuals within those vehicles and in the entire  
187 city, as shown in Fig. 3. The daily number of infectious individuals is computed taking  
188 into account the 14 days that the individuals remain infectious, *i.e.*, each individual who  
189 tested positive for COVID-19 counts up to 14 times, once per day, for the infectious curve.  
190 Figures 3a and 3b show the daily numbers regarding all infectious passengers and those  
191 infectious passengers who are healthcare workers, respectively. Similarly, the daily numbers  
192 of infectious individuals and infectious healthcare workers of the entire city are shown in  
193 Figs. 3c and 3d, respectively. While the first and second waves of the epidemic can be clearly  
194 identified in both curves shown in Fig. 3a (infectious passengers) and Fig.3c (infectious  
195 individuals), only highly attenuated peaks during the second wave period can be visualized in  
196 the corresponding curves for healthcare workers, as shown in Figs. 3b and 3d. We conjecture  
197 that the explanation for this behavior may be twofold. First, due to the high contagion of  
198 healthcare workers during the first wave, this group of people may have achieved a large  
199 percentage of immunity, as compared to the rest of the population. Second, efficient Personal  
200 Protective Equipment (PPE) became more available in hospitals after the first wave. The  
201 results in Fig. 3e show that the percentage of infectious passengers with respect to all  
202 infectious individuals in Fortaleza was higher than 1% during most of the epidemic period.  
203 Finally, the evolution in time of the fraction between infectious passengers and infectious



204 individuals in the city who are both healthcare workers is shown in Fig. 3f.

205 The histogram of the values of  $\tau_{ij}$  for the network of PICs is shown in Fig. 4a. The  
206 obtained distribution is characterized by the average  $\langle \tau_{ij} \rangle^{PICs} \approx 28$  minutes. We find that  
207 CCs, defined by  $\tau_{ij} > \tau_c = 15$  minutes, represent about 62% of the PICs, as shown by  
208 the Complementary Cumulative Distribution Function (CCDF) in the inset of Fig. 4a. For  
209 the network of CCs, the average of the shared ride times is  $\langle \tau_{ij} \rangle^{CCs} \approx 39$  minutes. Fig. 4b  
210 shows the network of CCs taking into consideration the periods of social isolation, lockdown,  
211 and economic reopening. As depicted, it is composed of several trees, where the vertices  
212 represent bus passengers that were diagnosed with COVID-19 and the edges correspond to  
213 CCs. Bus passengers identified as healthcare workers in the network are highlighted in red.  
214 The size of the vertices is proportional to their outdegrees.

215 At this point, we show that it is possible to perform a direct comparison between the  
216 computed values of  $Re_r^{bus}$  obtained from the contact tracing model for different time windows  
217 and the corresponding effective reproduction numbers  $Re^{city}$  estimated from the compart-  
218 mental model. First, it is reasonable to assume that  $Re_r^{bus} = Re_r^{city}$ , as long as the population  
219 traveling by public buses can be considered as statistically equivalent, from an epidemiologic  
220 point of view, to the rest of the city. As a consequence of this assumption and using Eq. (9),  
221 we can write that

$$Re_r^{bus} = \psi Re^{city}, \quad (10)$$

222 where the parameter  $\psi = [\alpha + (1 - \alpha)\mu]^{-1}$  depends on the time window used for model  
223 inference with the IEnKF technique. We now proceed with the comparison between contact  
224 tracing and compartmental models. In practical terms, this is achieved by upscaling  $\langle d_{out}^{CCs} \rangle$   
225 to the numerical values obtained for  $Re^{city}$  during the early period of the SARS-CoV-2  
226 epidemic, before the restrictions of isolation and social distancing imposed by the State  
227 Government took effect. Considering Eqs. (1) and (10), we use the relation  $\chi \langle d_{out}^{CCs} \rangle =$   
228  $\psi Re^{city}$  and the numerical values of  $\langle d_{out}^{CCs} \rangle$ ,  $\psi$  and  $Re^{city}$  on the day that corresponds to  
229 the maximum of  $Re^{city}$  during the first wave (April 8, 2020) to calculate  $\chi \approx 37$ . This  
230 constant combined with the values of  $\psi$  from the inference with the compartmental model,  
231 and the values of  $\langle d_{out}^{CCs} \rangle$  from the contact tracing, both calculated for all time windows,  
232 are then used to obtain the entire curve of  $Re^{bus} = (\chi/\psi) \langle d_{out}^{CCs} \rangle$  (see the time evolution of  
233  $\chi/\psi$  in Fig. S3 of the Supplementary Information). The value of  $\chi$  can be understood as  
234 the product of two factors,  $\chi = \chi_{rr} \chi_{ru}$ . Assuming the equality between the proportions of

235 CCs in the pairs of infectious and exposed passengers with existing and missing values of  
236  $\tau_{ij}$ , we estimate  $\chi_{rr} \approx 1/0.586 \approx 1.70$  as a balance factor for possible missing CCs. The  
237 value of the remaining factor  $\chi_{ru} \approx 21.76$  expresses the sub-notification of the confirmed  
238 cases as well as our lack of knowledge on the transmission from reported to unreported  
239 infectious passengers, for which the factor  $(1 - \alpha)/\alpha$  could be a lower bound (see Fig. S2  
240 of the Supplementary Information for a sensitivity analysis of the model with parameter  
241  $\alpha$ ), approximately between 5 and 9 [32]. In an entirely similar fashion, by considering only  
242 reported infectious passengers that can be identified as healthcare workers, we can estimate  
243 their particular effective reproduction number as  $Re^{health} = (\chi/\psi)\langle d_{out}^{CCs} \rangle^{health}$  with the same  
244 upscaling factor  $\chi/\psi$  used for all infectious passengers and  $\langle d_{out}^{CCs} \rangle^{health}$  is the average of the  
245 vertices outdegrees for healthcare workers.

246 In Figure 5, we show the comparison between the estimates of  $Re^{bus}$  and  $Re^{city}$  from March  
247 to November 2020. Although the contact tracing and compartmental models are defined on  
248 different scales, the former on a microscopic scale and the latter on a macroscopic scale,  
249 the two curves capture the same decreasing trend associated to both social isolation and  
250 lockdown periods. We note that  $Re^{bus}$  consistently follows  $Re^{city}$  during the local COVID-  
251 19 outbreak, except for a three-month period between the first and the second waves of  
252 daily cases. In this period, the  $Re^{bus}$  decayed to undetectable standards despite the fact  
253 that the number of daily bus validations has increased (see Fig. 2a). As also shown in  
254 Fig. 5,  $Re^{health}$  was systematically higher than  $Re^{bus}$ , which unveils that the healthcare  
255 workers played an important role in the transmission within buses during the first wave of  
256 COVID-19 in Fortaleza. Furthermore,  $Re^{health}$  remained undetectable even in the beginning  
257 of the second wave, in contrast to  $Re^{bus}$  and notwithstanding the increase of the number  
258 of daily bus validations of healthcare workers, as shown in Fig. 2a. As shown in the inset  
259 of Fig. 5, the maximum ratio  $Re^{health}/Re^{bus}$  occurred soon after the lockdown period, since  
260 the hospitals were still overloaded due to the peak of cases at the beginning of May and the  
261 new daily infections were low in the beginning of the reopening period. We emphasize that  
262 the complement of  $Re^{health}$ , due to non-healthcare workers, behaves similar to  $Re^{bus}$ .

## 263 IV. CONCLUSIONS

264 In summary, two epidemiological models have been used in this work to understand the  
265 transmission on public transportation during the COVID-19 outbreak in Fortaleza, Ceará,  
266 Brazil. Whilst the compartmental model accounts for the transmission in the entire city  
267 (macroscopic scale), the contact tracing model has been used to estimate the transmission  
268 inside city buses (microscopic scale) through the concept of CCs. Both models were fed  
269 with real data of bus validations and of COVID-19 confirmed cases and deaths. Our results  
270 show that  $Re^{bus}$  consistently follows  $Re^{city}$  during the local COVID-19 outbreak, except for a  
271 three-month period between the first and the second waves of daily cases. Furthermore, the  
272 transmission from healthcare workers within buses until the end of July is characterized by a  
273 value of  $Re^{health}$  persistently greater than  $Re^{bus}$ . Healthcare workers, even the non-frontline  
274 professionals, are more likely to get and, consequently, spread the pathogen because their  
275 social network distances to individuals that tested positive for COVID-19 are very short  
276 compared to non-highly exposed workers. Despite being more tested, healthcare workers  
277 may not even know that they are infectious when they board a bus due to eventual time  
278 delays of the result of a COVID-19 test. Other groups of highly exposed people may affect  
279 the dynamics of dissemination of the virus in a similar way, *e.g.*, education workers and  
280 police officers. Therefore, our results reinforce the worldwide claim that it is imperative to  
281 propose special policies to support displacement (or to avoid it) of highly exposed groups of  
282 people. Finally, we suggest that the intensity and the necessity of using public transportation  
283 by highly exposed groups must be seriously considered as a criterion to prioritize their  
284 vaccination.

## 285 V. METHODS

### 286 A. Datasets

#### 287 1. Bus validations

288 Most part of bus passengers in Fortaleza ( $\approx 94\%$ ) pay their bus fares with a smart card.  
289 Every time a passenger passes their card on a ticket gate of a bus, a validation record is  
290 created. The Fortaleza City Hall compiled and made available an anonymized dataset of

291 bus validations with the following information: a citizen’s ID (a hash code), a vehicle ID  
292 (another hash code), the date and time of the validation record and the estimated ride time.  
293 The dataset ranges from March to December 2020, totaling 107,488,528 validation registers  
294 that refers to 1,426,569 different passengers.

## 295 2. COVID-19 confirmed cases and deaths

296 The dataset of COVID-19 confirmed cases and deaths is an anonymized list of all in-  
297 dividuals diagnosed with the disease in Fortaleza from March to December 2020. These  
298 data were also processed and made available by the Fortaleza City Hall. Such dataset is  
299 organized in columns as follows: a citizen’s ID (the same hash code used in the previous  
300 dataset), the date of OS, a confirmed death flag, the date of death and a healthcare worker  
301 flag. In the period of time ranged by the data, there are 85,553 confirmed cases (5,960 of  
302 healthcare workers) and 3,075 confirmed deaths (227 of healthcare workers). We emphasize  
303 that these healthcare workers are not only the frontline professionals but also people whose  
304 jobs are related to the health field. Finally, we found that 9,032 people (721 healthcare  
305 workers) were diagnosed with COVID-19 and used their smart card on buses at least once  
306 from March to December 2020.

## 307 B. Iterated Ensemble Kalman Filter

308 We use the Iterated Ensemble Kalman Filter (IEnKF) framework [32, 35–37] to infer the  
309 compartmental model parameters and initial subpopulations. The algorithm is based on  
310 comparing predictions of the model  $f(\cdot)$  obtained by the numerical integration of Eqs. (3)-  
311 (7) of the main text with a set of  $T$  observations  $\mathcal{O}_1, \dots, \mathcal{O}_T$  taken at discrete times  $t_1, \dots, t_T$   
312 within an observation window (see Fig. S4 of the Supplementary Information). The inference  
313 framework starts from an initial state vector  $X^{(0)} = \{S, E, I_r, I_u, R, D_r\}^{(0)}$ , and an initial  
314 parameter vector  $\theta^{(0)} = \{\beta, \mu, \sigma, \gamma, \alpha, \phi\}^{(0)}$ . To these vectors, uncertainties are attributed in  
315 terms of the variance matrices  $\sigma_X$  and  $\sigma_\theta$ , respectively. For each iteration  $m$ , an ensemble  
316 of  $P$  “particles” is generated such that each particle has the initial state at time  $t_0$  drawn  
317 from a multivariate normal distribution with mean  $X^{(m-1)}$  and variance  $a^{(m-1)}\sigma_X$ , where  
318  $0 < a < 1$  is a “cooling factor”. The initial state vector for particle  $i$  is denoted by

319  $X(t_0, i) = \mathcal{N}(X^{(m-1)}, a^{(m-1)}\sigma_X)$ . These states are also used to set  $X_F(t_0, i)$  which define  
 320 the posterior distribution at time  $t_0$ . Analogously, each particle  $i$  has an initial parameter  
 321 vector  $\theta(t_0, i) = \mathcal{N}(\theta^{(m-1)}, b^{(m-1)}\sigma_\theta)$ , where  $0 < b < 1$  is another cooling factor. The  
 322 inference proceeds by numerically integrating the model from these initial conditions, such  
 323 that the predicted vector state for each particle  $i$  at time  $t_n$  is obtained from the following  
 324 distribution,  $X_P(t_n, i) = f(X_F(t_{n-1}, i), \theta(t_{n-1}, i))$ . Based on these predictions, a weight  
 325  $W(t_n, i)$  is assigned to each particle  $i$ , such that

$$W(t_n, i) = \exp\left(-\frac{|\mathcal{O}(t_n, i) - \mathcal{O}_n|}{\Theta}\right), \quad (11)$$

326 where  $\mathcal{O}(t_n, i)$  is the predicted value for the observed quantities at time  $t_n$  for particle  $i$ ,  
 327 and  $\Theta$  is a “temperature”. In our case,  $\mathcal{O}(t_n, i)$  is the prediction for the cumulative number  
 328 of daily reported deaths  $D_r(t_n, i)$ . The filtering process is accomplished by keeping the  
 329 particles with the largest weights with probability  $\mathcal{P} = W(t_n, i) / \sum_j W(t_n, j)$ . The states of  
 330 the filtered particles will set the posterior distribution at time  $t_n$ ,  $X_F(t_n, i) = X_P(t_n, i_{best})$ ,  
 331 where  $i_{best}$  is the index of the filtered particles [36]. The parameter vector is updated at  
 332 time  $t_n$  using  $\theta(t_n, i) = \mathcal{N}(\theta(t_{n-1}, i_{best}), b^{(m-1)}\sigma_\theta)$ . This filtering process continues until  
 333 all the observations  $\mathcal{O}_1, \dots, \mathcal{O}_N$  are compared. The iterative process continues by setting  
 334 the initial state vector  $X^{(m)}$  and parameter vector  $\theta^{(m)}$  for the next iteration. The next  
 335 parameter vector is given by [35]:

$$\theta^{(m)} = \theta^{(m-1)} + V(t_1) \sum_{n=1}^N V^{-1}(t_n) (\bar{\theta}(t_n) - \bar{\theta}(t_{n-1})), \quad (12)$$

336 where  $\bar{\theta}(t_n)$  is the sample mean of  $\theta(t_n, i_{best})$  and  $V(t_n)$  is the variance [35, 36]. The next  
 337 state vector is given by the sample mean,

$$X^{(m)} = \frac{1}{P} \sum_{j_{best}=1}^P X(t_0, j_{best}). \quad (13)$$

338 After each iteration  $m$ , the initial state vector  $X^{(m)}$  and parameter vector  $\theta^{(m)}$  are used  
 339 to compute the evolution of the model for the whole observation window  $1, \dots, t_T$ . The  
 340 performance of the inferred model is computed by evaluating the error

$$\varepsilon^{(m)} = \frac{1}{T} \sum_{n=1}^T |\mathcal{O}_n^{(m)} - \mathcal{O}_n|^2. \quad (14)$$

341 The iteration continues until  $|\varepsilon^{(m)} - \varepsilon^{(m-1)}| < \epsilon_{max}$ , where the threshold used here is  $\epsilon_{max} =$   
342 0.01. In Table S1 of the Supplementary Information, we report the values of the estimated  
343 parameters for consecutive time windows.

## 344 VI. ACKNOWLEDGMENTS

345 We gratefully acknowledge CNPq, CAPES, FUNCAP, the National Institute of Science  
346 and Technology for Complex Systems in Brazil and the Edson Queiroz Foundation for fi-  
347 nancial support.

## 348 VII. CONTRIBUTIONS

349 C.P., H.A.C., E.A.O., C.C., A.S.L., J.S.A. and V.F. designed research; C.P., H.A.C.,  
350 E.A.O., C.C., A.S.L., J.S.A. and V.F. performed research; C.P., H.A.C., E.A.O., C.C.,  
351 A.S.L., J.S.A. and V.F. analyzed data; and C.P., H.A.C., E.A.O., C.C., A.S.L., J.S.A. and  
352 V.F. wrote the paper. All authors reviewed the manuscript.

## 353 VIII. COMPETING INTERESTS

354 The authors declare no competing financial interests.

## 355 IX. DATA AVAILABILITY

356 This study was approved by the Institutional Review Board (IRB) at Universidade de  
357 Fortaleza (UNIFOR). Two datasets were used with the approval and consent obtained by  
358 the Fortaleza City Hall, Ceará, Brazil. The first is a list of COVID-19 confirmed cases and  
359 deaths of patients in Fortaleza and the second consists of bus validations records from smart  
360 cards of passengers, both collected during the period from March to December, 2020. In  
361 the context of the ongoing health crisis, we make available these anonymized datasets under

362 request to E. Oliveira at [erneson@unifor.br](mailto:erneson@unifor.br).

---

- 363 [1] COVID-19 transmission—up in the air. *The Lancet. Respiratory Medicine* (2020). [https://doi.org/10.1016/S2213-2600\(20\)30514-2](https://doi.org/10.1016/S2213-2600(20)30514-2)
- 364
- 365 [2] Lloyd-Smith, J. O., Schreiber, S. J., Kopp, P. E., & Getz, W. M. Superspreading and the  
366 effect of individual variation on disease emergence. *Nature* **438**, 355-359 (2005). <https://doi.org/10.1038/nature04153>
- 367
- 368 [3] Lossio-Ventura, J. A. *et al.* DYVIC: DYnamic VIRus Control in Peru. *In 2020 IEEE Inter-*  
369 *national Conference on Bioinformatics and Biomedicine (BIBM)* 2264-2267 (2020). <https://doi.org/10.1103/PhysRevResearch.3.013163>
- 370
- 371 [4] Serafino, M. *et al.* Superspreading k-cores at the center of COVID-19 pandemic persistence.  
372 *arXiv preprint arXiv:2103.08685* (2021). <https://doi.org/10.1101/2020.08.12.20173476>
- 373 [5] Reyna-Lara, A. *et al.* Virus spread versus contact tracing: Two competing contagion processes.  
374 *Physical Review Research*, **3**, 013163 (2021). <https://doi.org/10.1103/PhysRevResearch.3.013163>
- 375
- 376 [6] Hamner, L. *et al.* High SARS-CoV-2 Attack Rate Following Exposure at a Choir Practice -  
377 Skagit County, Washington, March 2020. *MMWR Morb Mortal Wkly Rep* **69**, 606–610 (2020).  
378 <http://doi.org/10.15585/mmwr.mm6919e6>
- 379 [7] Majra, D., Benson, J., Pitts, J. & Stebbing, J. SARS-CoV-2 (COVID-19) superspreader  
380 events. *Journal of Infection* **82**, 36-40 (2021). <https://doi.org/10.1016/j.jinf.2020.11.021>
- 381
- 382 [8] Liu, Y. *et al.* Aerodynamic analysis of SARS-CoV-2 in two Wuhan hospitals. *Nature* **582**,  
383 557–560 (2020). <https://doi.org/10.1038/s41586-020-2271-3>
- 384 [9] Lednicky, J. A. *et al.* Viable SARS-CoV-2 in the air of a hospital room with COVID-19  
385 patients *International Journal of Infectious Diseases* **100**, 476-482 (2020). <https://doi.org/10.1016/j.ijid.2020.09.025>
- 386
- 387 [10] Kwon, K. *et al.* Evidence of Long-Distance Droplet Transmission of SARS-CoV-2 by Direct  
388 Air Flow in a Restaurant in Korea. *Journal of Korean Medical Science* **35**, e415 (2020).  
389 <https://doi.org/10.3346/jkms.2020.35.e415>

- 390 [11] Böhmer, M. M. *et al.* Investigation of a COVID-19 outbreak in Germany resulting from a  
391 single travel-associated primary case: a case series. *The Lancet Infectious Diseases* **20**,  
392 920-928 (2020). [https://doi.org/10.1016/S1473-3099\(20\)30314-5](https://doi.org/10.1016/S1473-3099(20)30314-5)
- 393 [12] Kakimoto, K. *et al.* Initial Investigation of Transmission of COVID-19 Among Crew Members  
394 During Quarantine of a Cruise Ship - Yokohama, Japan, February 2020. *MMWR Morb Mortal*  
395 *Wkly Rep* **69**, 312-313 (2020). <http://doi.org/10.15585/mmwr.mm6911e2>
- 396 [13] Mizumoto, K. & Chowell, G. Transmission potential of the novel coronavirus (COVID-19)  
397 onboard the diamond Princess Cruises Ship, 2020. *Infectious Disease Modelling* **5**, 264-270  
398 (2020). <https://doi.org/10.1016/j.idm.2020.02.003>
- 399 [14] Vuchic, V. R. *Urban transit: operations, planning, and economics* (John Wiley & Sons, Hobo-  
400 ken, 2017).
- 401 [15] Stoddard, S. T. *et al.* The role of human movement in the transmission of vector-borne  
402 pathogens. *Plos Neglected Tropical Diseases* **3**, e481 (2009). [https://doi.org/10.1371/](https://doi.org/10.1371/journal.pntd.0000481)  
403 [journal.pntd.0000481](https://doi.org/10.1371/journal.pntd.0000481)
- 404 [16] Edelson, P. J. & Phipers, M. TB transmission on public transportation: A review of published  
405 studies and recommendations for contact tracing. *Travel Medicine and Infectious Disease* **9**,  
406 27-37 (2011). <https://doi.org/10.1016/j.tmaid.2010.11.001>
- 407 [17] Bomfim, R. *et al.* Predicting dengue outbreaks at neighbourhood level using human mobility  
408 in urban areas. *Journal of the Royal Society Interface* **17**, 20200691 (2020). [https://doi.](https://doi.org/10.1098/rsif.2020.0691)  
409 [org/10.1098/rsif.2020.0691](https://doi.org/10.1098/rsif.2020.0691)
- 410 [18] Kraemer, M. U. G. *et al.* The effect of human mobility and control measures on the COVID-  
411 19 epidemic in China. *Science* **368** 493-497 (2020). [https://doi.org/10.1126/science.](https://doi.org/10.1126/science.abb4218)  
412 [abb4218](https://doi.org/10.1126/science.abb4218)
- 413 [19] Schlosser, F. *et al.* COVID-19 lockdown induces disease-mitigating structural changes in mo-  
414 bility networks. *Proceedings of the National Academy of Sciences* **117**, 32883-32890 (2020).  
415 <https://doi.org/10.1073/pnas.2012326117>
- 416 [20] Melo, H. P. *et al.* Heterogeneous impact of a lockdown on inter-municipality mobility. *Physical*  
417 *Review Research* **3**, 013032 (2021). <https://doi.org/10.1103/PhysRevResearch.3.013032>
- 418 [21] Di Carlo, P. *et al.* Air and surface measurements of SARS-CoV-2 inside a bus during normal op-  
419 eration. *Plos One* **15**, e0235943 (2020). <https://doi.org/10.1371/journal.pone.0235943>



- 420 [22] Goscé, L. & Johansson, A. Analysing the link between public transport use and airborne  
421 transmission: mobility and contagion in the London underground. *Environmental Health* **17**,  
422 1-11 (2018). <https://doi.org/10.1186/s12940-018-0427-5>
- 423 [23] Jenelius, E. & Cebecauer, M. Impacts of COVID-19 on public transport ridership in Sweden:  
424 Analysis of ticket validations, sales and passenger counts. *Transportation Research Interdisci-*  
425 *plinary Perspectives* **8**, 100242 (2020). <https://doi.org/10.1016/j.trip.2020.100242>
- 426 [24] Shen, Y. *et al.* Community outbreak investigation of SARS-CoV-2 transmission among bus  
427 riders in eastern China. *JAMA internal medicine* **180**, 1665-1671 (2020). [https://doi.org/](https://doi.org/10.1001/jamainternmed.2020.5225)  
428 [10.1001/jamainternmed.2020.5225](https://doi.org/10.1001/jamainternmed.2020.5225)
- 429 [25] Shen, J. *et al.* Prevention and control of COVID-19 in public transportation: experience from  
430 China. *Environmental pollution* **266**, 115291 (2020). [https://doi.org/10.1016/j.envpol.](https://doi.org/10.1016/j.envpol.2020.115291)  
431 [2020.115291](https://doi.org/10.1016/j.envpol.2020.115291)
- 432 [26] Zhang, Z. *et al.* Disease transmission through expiratory aerosols on an urban bus. *Physics of*  
433 *Fluids* **33**, 015116 (2021). <https://doi.org/10.1063/5.0037452>
- 434 [27] Hu, M. *et al.* Risk of coronavirus disease 2019 transmission in train passengers: An epi-  
435 demiological and modeling study. *Clinical Infectious Diseases* **72**, 604-610 (2021). [https:](https://doi.org/10.1093/cid/ciaa1057)  
436 [//doi.org/10.1093/cid/ciaa1057](https://doi.org/10.1093/cid/ciaa1057)
- 437 [28] He, X. *et al.* Temporal dynamics in viral shedding and transmissibility of COVID-19. *Nature*  
438 *Medicine* **26**, 672-675 (2020). <https://doi.org/10.1038/s41591-020-0869-5>
- 439 [29] Li, Q. *et al.* Early transmission dynamics in Wuhan, China, of novel coronavirus-infected pneu-  
440 monia. *N. Engl. J. Med.* **382**, 1199-1207 (2020). <https://doi.org/10.1056/NEJMoa2001316>
- 441 [30] Sanche, S. *et al.* High Contagiousness and Rapid Spread of Severe Acute Respiratory Syndrome  
442 Coronavirus 2. *Emerging Infectious Diseases* **26**, 1470-1477 (2020). [https://doi.org/10.](https://doi.org/10.3201/eid2607.200282)  
443 [3201/eid2607.200282](https://doi.org/10.3201/eid2607.200282)
- 444 [31] Centers for Disease Control and Prevention. Available at [https://www.cdc.](https://www.cdc.gov/coronavirus/2019-ncov/php/contact-tracing/contact-tracing-plan/contact-tracing.html)  
445 [gov/coronavirus/2019-ncov/php/contact-tracing/contact-tracing-plan/](https://www.cdc.gov/coronavirus/2019-ncov/php/contact-tracing/contact-tracing-plan/contact-tracing.html)  
446 [contact-tracing.html](https://www.cdc.gov/coronavirus/2019-ncov/php/contact-tracing/contact-tracing-plan/contact-tracing.html) Accessed May 14, 2021.
- 447 [32] Li, R. *et al.* Substantial undocumented infection facilitates the rapid dissemination of  
448 novel coronavirus (SARS-CoV-2). *Science* **368**, 489-493 (2020). [https://doi.org/10.1126/](https://doi.org/10.1126/science.abb3221)  
449 [science.abb3221](https://doi.org/10.1126/science.abb3221)

- 450 [33] Byambasuren, O. *et al.* Estimating the extent of asymptomatic COVID-19 and its potential  
451 for community transmission: Systematic review and meta-analysis. *Journal of the Association*  
452 *of Medical Microbiology and Infectious Disease Canada* **5**, 223-234 (2020). [https://doi.org/](https://doi.org/10.3138/jammi-2020-0030)  
453 [10.3138/jammi-2020-0030](https://doi.org/10.3138/jammi-2020-0030)
- 454 [34] Le Marshall, J., Rea, A., Leslie, L., Seecamp, R. & Dunn, M. Error characterisation of atmo-  
455 spheric motion vectors. *Aust. Meteorol. Mag.* **53**, 123-131 (2004).
- 456 [35] Ionides, E. L., Bretó, C. & King, A. A. Inference for nonlinear dynamical systems. *Proc. Natl.*  
457 *Acad. Sci. U. S. A.* **103**, 18438-18443 (2006). <https://doi.org/10.1073/pnas.0603181103>
- 458 [36] King, A. A., Ionides, E. L., Pascual, M. & Bouma, M. J. Inapparent infections and cholera  
459 dynamics. *Nature* **454**, 877-880 (2008). <https://doi.org/10.1038/nature07084>
- 460 [37] Sakov, P., Oliver, D. S. & Bertino, L. An Iterative EnKF for Strongly Nonlinear  
461 Systems. *Monthly Weather Review* **140**, 1988-2004 (2012). [https://doi.org/10.1175/](https://doi.org/10.1175/MWR-D-11-00176.1)  
462 [MWR-D-11-00176.1](https://doi.org/10.1175/MWR-D-11-00176.1)

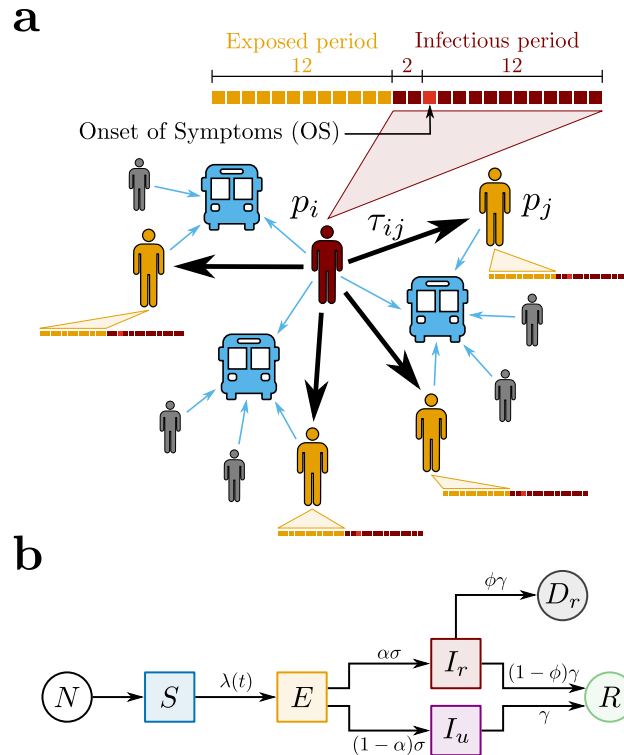

**Fig. 1. Proposed Models for COVID-19 and Spreading Scenarios.** (a) Potentially Infectious Contacts (PICs). We define a PIC when an infectious passenger  $p_i$  (in red) and an exposed passenger  $p_j$  (in yellow) share the same bus. The weight  $\tau_{ij}$  is the estimated value of the ride time shared by  $p_i$  and  $p_j$ . The time lines show the infectious (in red) and the exposed periods (in yellow) of each passenger, where each square represents one day. The time lines are built based on the Onset of Symptoms (OS). Precisely, the infectious period begins 2 days before OS and ends 12 days after OS, while the exposed period begins 14 days before OS and ends 2 days before OS. Other passengers (in gray), even though they have shared the same bus with  $p_i$ , either were not notified as COVID-19 cases or, however notified, they were not considered as PICs because they were not in their exposed period. (b) The SEIIR model. The total population of size  $N$  provides the susceptible population  $S$  (in blue). The susceptible individuals become exposed  $E$  (in yellow) at a time-dependent rate  $\lambda(t)$ . The exposed individuals become infectious at a time rate  $\sigma$ . A fraction  $\alpha$  of the infectious population is reported  $I_r$  (in red), while a fraction  $(1 - \alpha)$  is unreported  $I_u$  (in purple). The infectious individuals that recover, reported or not, become recovered  $R$  (in green) at a time rate  $\gamma$ . Finally, it is assumed that a fraction  $\phi$  of the removed population  $\gamma I_r$  deceases  $D_r$  (in dark gray).

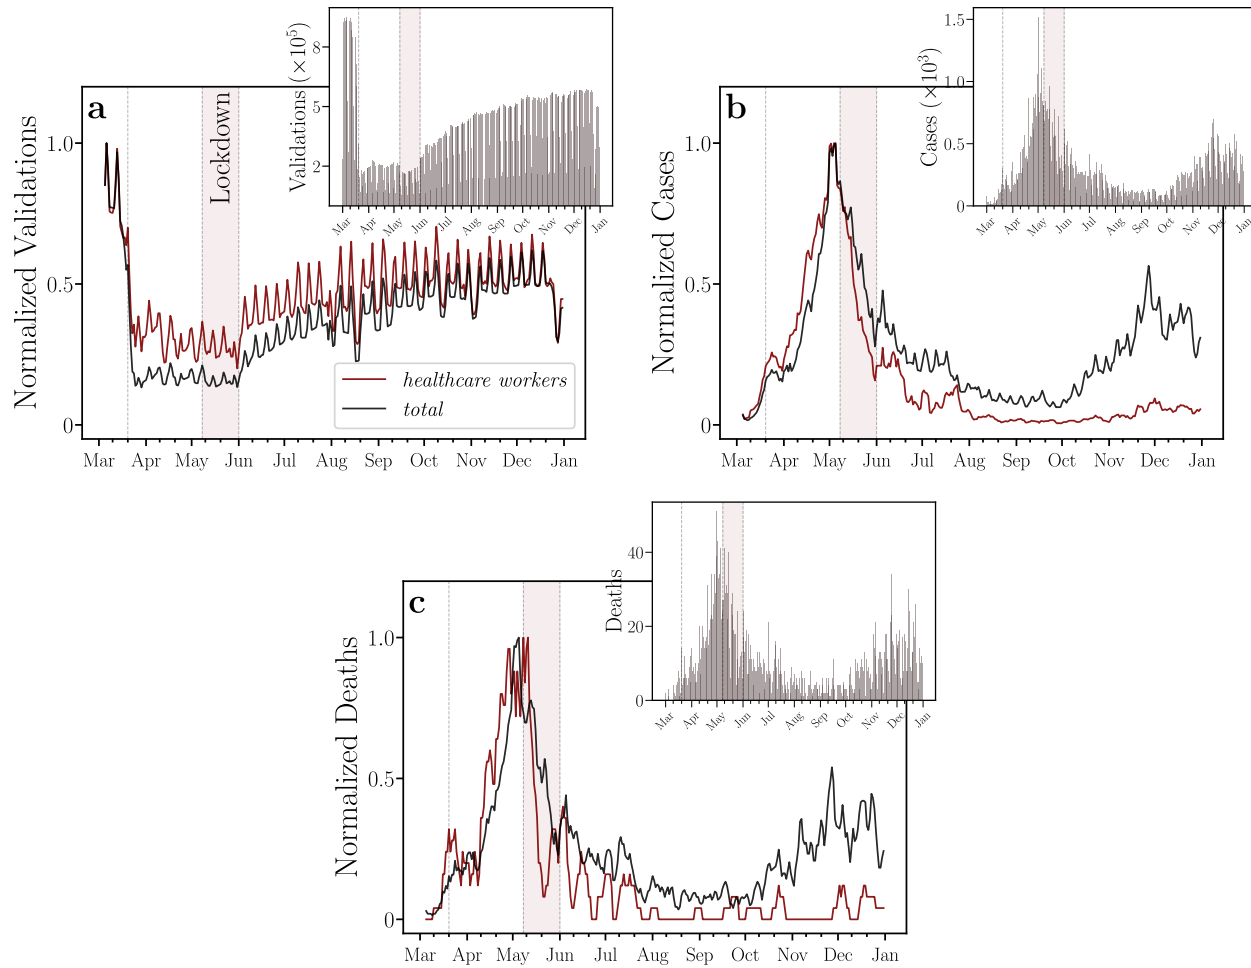

**Fig. 2. Time series and moving averages of bus validations, COVID-19 cases, and COVID-19 deaths.** Time evolutions of the normalized moving averages of (a) bus validations, (b) COVID-19 cases, and (c) deaths, for healthcare workers (in red) and all individuals (in black). The insets show their corresponding daily numbers. In (a), we note that healthcare workers that came into contact with SARS-CoV-2 during the studied period did not reduce their bus rides as much as other passengers. In addition, the normalized moving averages of bus validations of healthcare workers and of all individuals are getting closer to each other again as the economic reopening progresses. In (b) and (c), we find that both the normalized moving averages of cases and of deaths, respectively, for healthcare workers increased before those of all individuals until the lockdown regime. The windows of moving averages have 5 days of width for all curves. We normalized each moving average by its maximum. The vertical dotted lines represent the beginning of social isolation (State Decree 33,519), lockdown (State Decree 33,574), and economic reopening (State Decree 33,608) regimes imposed on March 20, May 8, and June 1, 2020, respectively. We also highlight, in light red, the lockdown period in the city of Fortaleza.

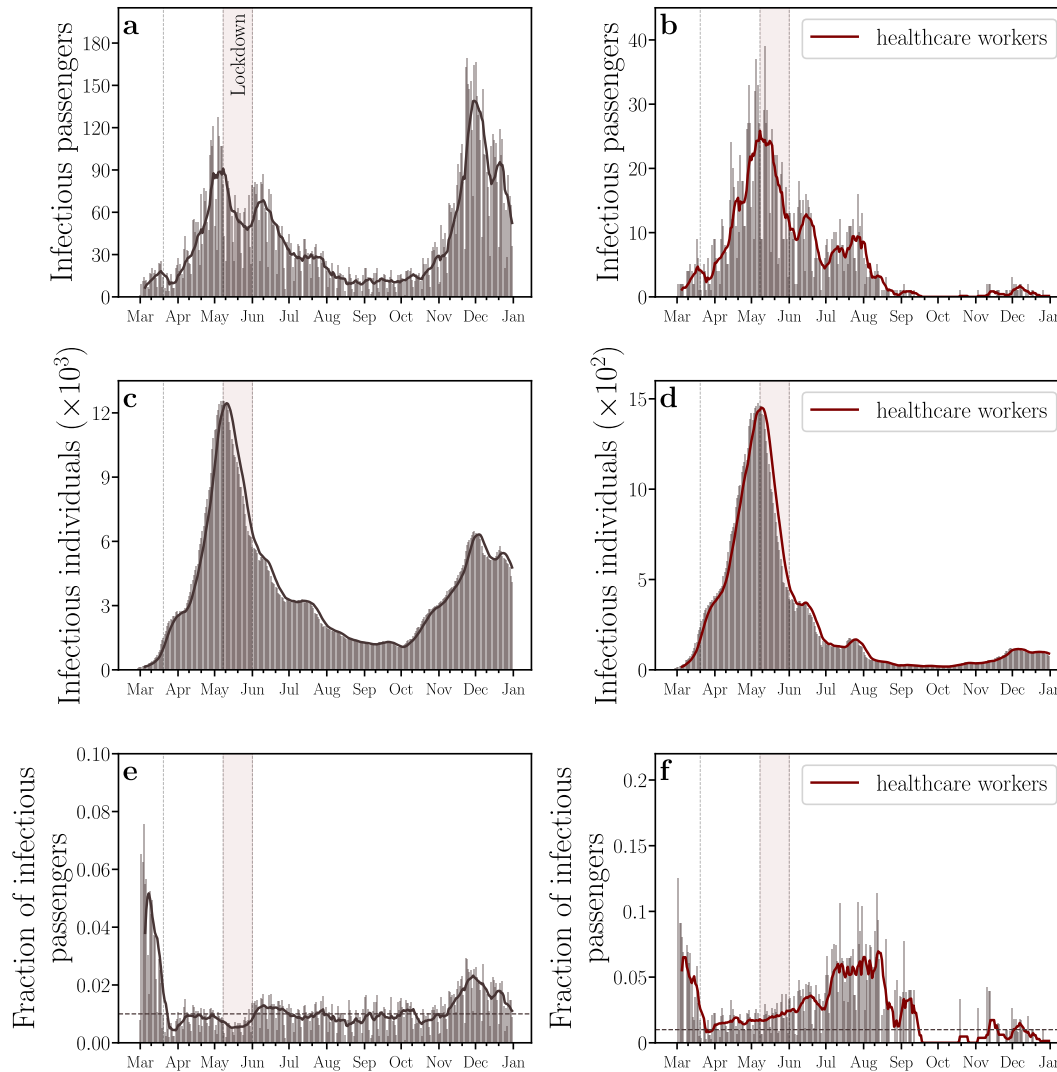

**Fig. 3. Representativeness of the dataset of COVID-19 confirmed cases on buses.** The daily numbers of (a) all infectious passengers, (b) infectious passengers who are healthcare workers, (c) all infectious individuals in the entire city, and (d) infectious individuals who are healthcare workers in the entire city. For healthcare workers, we highlight an unexpected emergence of a single peak in the daily numbers of infectious individuals within buses and in the entire city, which contrasts to the first and the second waves of COVID-19. We conjecture that the explanation for this behavior may be the lack of Personal Protective Equipment (PPE) in hospitals during the first wave or the herd immunity of healthcare workers during the second wave. (e) The fraction of all infectious passengers. (f) The fraction of infectious passengers who are healthcare workers. These results show that the percentage of infectious passengers with respect to all infectious individuals in Fortaleza was higher than 1% during most of the epidemic period (dashed gray line). All solid lines represent moving averages with windows of 7 days.

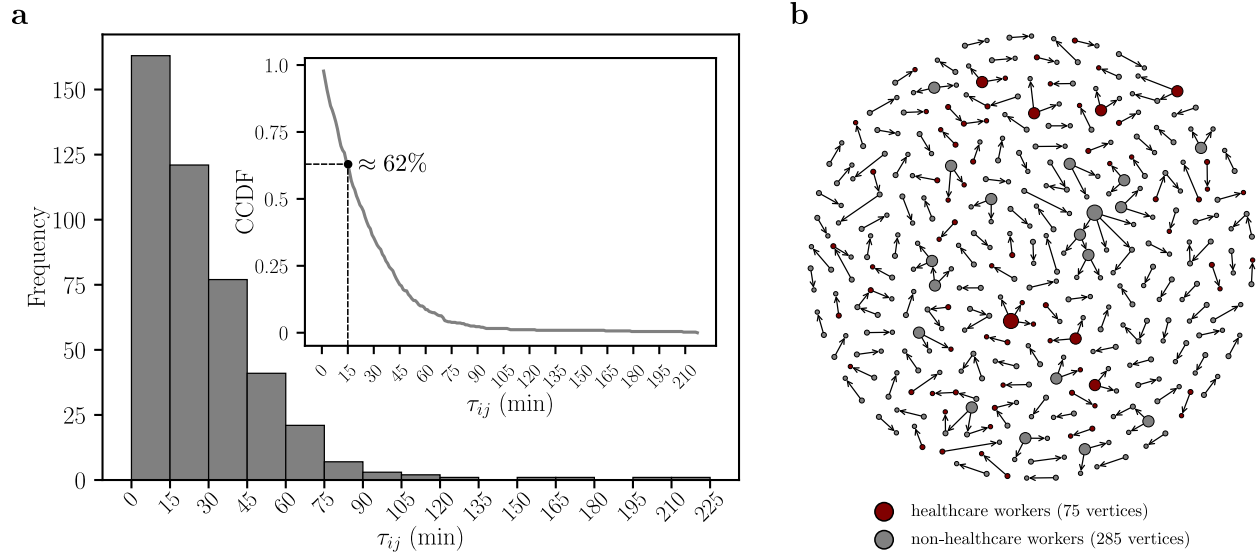

**Fig. 4. Shared Ride Time Histogram  $\tau_{ij}$  and Network of Close Contacts (CCs).** (a) We show the weight distribution  $\tau_{ij}$  of the network of Potentially Infectious Contacts (PICs) in 15-minute-width bins. The average of the shared ride times of PICs is  $\langle \tau_{ij} \rangle^{PICs} \approx 28$  minutes. Applying the threshold  $\tau_c = 15$  minutes in the network of PICs, we define a network of Close Contacts (CCs). For the network of CCs, the average of the shared ride times is  $\langle \tau_{ij} \rangle^{CCs} \approx 39$  minutes. The inset shows the Complementary Cumulative Distribution Function (CCDF) of  $\tau_{ij}$ . We find that the percentage of the edges with  $\tau_{ij}$  greater than  $\tau_c = 15$  minutes is  $\approx 62\%$  (dashed line), *i.e.*, most part of PICs are CCs. (b) The vertices represent the bus passengers that were diagnosed with COVID-19 and the edges corresponds to the CCs each passenger had using the public transportation system in Fortaleza. The healthcare and non-healthcare workers are represented by red and gray vertices, respectively. The size of the vertices is proportional to their outdegrees.

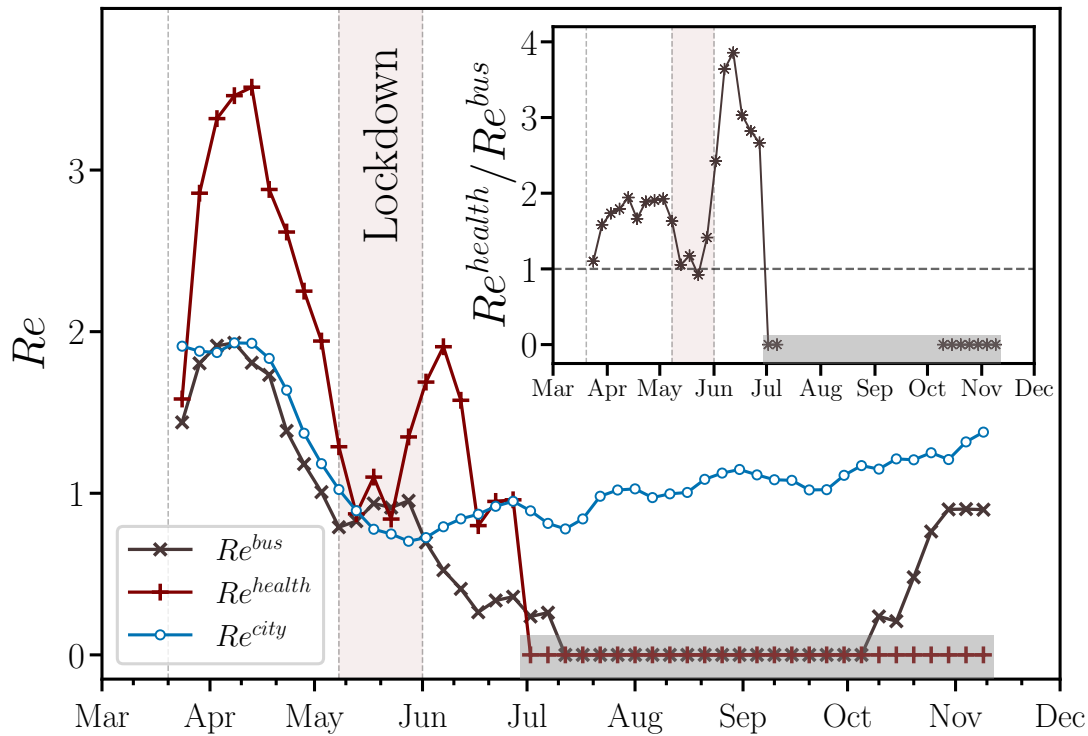

Fig. 5. **Time evolution of the effective reproduction numbers.** Moving averages of the effective reproduction number for the entire city,  $Re^{city}$  (blue o), for buses,  $Re^{bus}$  (gray x), and for healthcare workers in the buses,  $Re^{health}$  (red +). We find that  $Re^{bus}$  consistently follows  $Re^{city}$  during the local COVID-19 outbreak, except for a three-month period between the first and the second waves of daily cases. We also show that  $Re^{health}$  was systematically higher than  $Re^{bus}$ , which unveils that the healthcare workers played an important role in the transmission within buses during the first wave of COVID-19 in Fortaleza. The inset shows that the maximum ratio  $Re^{health} / Re^{bus}$  occurred soon after the lockdown period. The windows of moving averages have 22 days of width with step size of 5 days for all curves. In the period indicated by the shaded regions in the main plot and its inset, both  $Re^{bus}$  and  $Re^{health}$  decayed to undetectable standards, *i.e.*, no CCs could be identified under the framework of our contact tracing approach. The vertical dotted lines represent the beginning of social isolation (State Decree 33,519), lockdown (State Decree 33,574), and economic reopening (State Decree 33,608) regimes imposed on March 20, May 8, and June 1, 2020, respectively. We also highlight, in light red, the lockdown period in the city of Fortaleza.
